# Supplementary material for: Climatic Controls on Metabolic Constraints in the Ocean
Source: Copernicus journal article supplement (doi:10.5194/egusphere-2023-2822), 2023-12-04
Supplement: Supplementary file 1 [file egusphere-2023-2822-supplement.pdf]

# Supplementary material

## Climatic Controls on Metabolic Constraints in the Ocean

Precious Mongwe<sup>1</sup>, Matthew Long<sup>2</sup>, Takamitsu Ito<sup>3</sup>, Curtis Deutsch<sup>4</sup> and Yeray Santana-Falcón<sup>5</sup>

<sup>1</sup>Southern Ocean Carbon Climate Observatory (SOCCO), CSIR, Cape Town, South Africa

<sup>2</sup>Oceanography Section, Climate and Global Dynamics Laboratory, National Center for Atmospheric Research, Boulder, CO, United States of America

<sup>3</sup>School of Earth and Atmospheric Sciences, Georgia Institute of Technology, Atlanta, Georgia United States of America

<sup>4</sup>Department of Geosciences, Princeton University, Princeton, NJ, United States of America

<sup>5</sup>CNRM, Université de Toulouse, Météo-France, CNRS, Toulouse, 31057, France

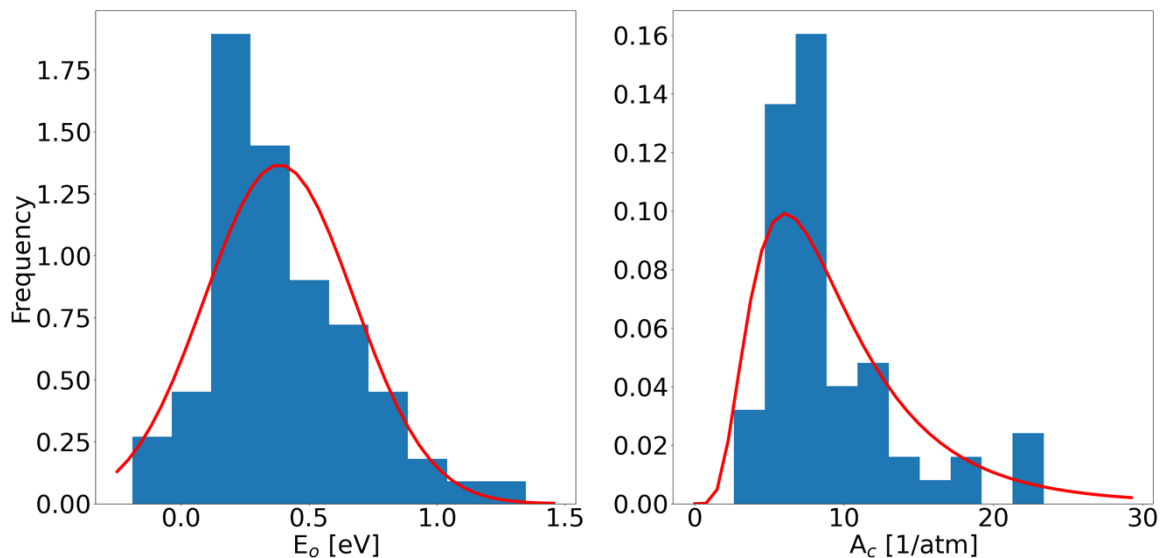

**Figure S1.** Physiological traits probability density function for the activation energy ( $E_o$ ) and the ecological hypoxic tolerance ( $A_c$ ) based on the Penn et al. (2018) physiological data. It shows that  $E_o$  is represented by a normal distribution and  $A_c$  by a lognormal distribution function.

## References

Penn, J. L., Deutsch, C., Payne, J. L., and Sperling, E. A.: Temperature-dependent hypoxia explains biogeography and severity of end-Permian marine mass extinction, *Science* (1979), 362, <https://doi.org/10.1126/science.aat1327>, 2018.
